# Supplementary material for: STING promotes proliferation and induces drug resistance in colorectal cancer by regulating the AMPK-mTOR pathway
Source: PubMed Central journal article supplement — J Gastrointest Oncol. 2022 Oct;13(5):2458–71. doi: 10.21037/jgo-22-957 (PMC9660059; doi:10.21037/jgo-22-957), 2022-10
Supplement: jgo-13-05-2458-dss.pdf [file jgo-13-05-2458-dss.pdf]

## Data Sharing Statement

|                     |                                                                                                                                                     |                                                                                                                                                                                |
|---------------------|-----------------------------------------------------------------------------------------------------------------------------------------------------|--------------------------------------------------------------------------------------------------------------------------------------------------------------------------------|
| <b>Article Info</b> | <a href="https://dx.doi.org/10.21037/jgo-22-957">https://dx.doi.org/10.21037/jgo-22-957</a>                                                         |                                                                                                                                                                                |
| <b>Item</b>         | <b>Question</b>                                                                                                                                     | <b>Authors' Response<br/>(place "-" if not applicable)</b>                                                                                                                     |
| 1                   | Would you like to share data collected for your study to others?                                                                                    | Yes.                                                                                                                                                                           |
| 2                   | If not, would you like to share the reason for your decision?                                                                                       | -                                                                                                                                                                              |
| 3                   | What data in particular will be shared?                                                                                                             | I am willing to share the data that association between stimulator of interferon genes (STING) and the clinicopathological factors of 32 patients with colorectal cancer (CRC) |
| 4                   | Any other documents will be shared? Such as study protocol, statistical analysis plan, informed consent form, clinical study report, analytic code. | Statistical analysis plan, informed consent form, and clinical study report will also be shared if requested.                                                                  |
| 5                   | When will data availability begin?                                                                                                                  | From the time the article was published                                                                                                                                        |
| 6                   | When will data availability end?                                                                                                                    | One year                                                                                                                                                                       |
| 7                   | To whom will you share the data?                                                                                                                    | Anyone interested in colorectal cancer research.                                                                                                                               |
| 8                   | For what type of analysis or purpose?                                                                                                               | Others can use my shared data for the analysis of colorectal cancer progress research.                                                                                         |
| 9                   | How or where can the data/documents be obtained?                                                                                                    | Emails could be sent to the address below to obtain the shared data: 3309535716@qq.com                                                                                         |
| 10                  | Any other restrictions?                                                                                                                             | We may balance the potential benefits and risks for each request and then provide the data that could be shared                                                                |
